1  
2  
3  
4  
5  
6  
7  
8  
9  
10  
11  
12  
13  
14  
15  
16  
17  
18  
19  
20  
21  
22  
23  
24  
25  
26  
27  
28

**Structures of the active HER2/HER3 receptor complex reveal dynamics at the dimerization interface induced by binding of a single ligand**

Devan Diwanji<sup>a, b, †</sup>, Raphael Trenker<sup>a, †</sup>, Tarjani M. Thaker<sup>a, c</sup>, Feng Wang<sup>d</sup>, David A. Agard<sup>d</sup>, Kliment A. Verba<sup>e, f, \*</sup>, Natalia Jura<sup>a, g, \*</sup>

<sup>a</sup>Cardiovascular Research Institute, University of California San Francisco, San Francisco, CA 94158, USA

<sup>b</sup>Medical Scientist Training Program, University of California San Francisco, San Francisco, CA 94158, USA

<sup>c</sup>Department of Chemistry and Biochemistry, The University of Arizona, AZ 85721, USA

<sup>d</sup>Department of Biochemistry and Biophysics, University of California San Francisco, CA 94158, USA

<sup>e</sup>Quantitative Biosciences Institute (QBI), University of California San Francisco, San Francisco, CA 94158, USA

<sup>f</sup>Department of Pharmaceutical Chemistry, University of California San Francisco, San Francisco, CA 94158, USA

<sup>g</sup>Department of Cellular and Molecular Pharmacology, University of California San Francisco, San Francisco, CA 94158, USA

<sup>†</sup>Authors contributed equally to the work

\*Correspondence should be addressed to K.A.V. ([kliment.verba@ucsf.edu](mailto:kliment.verba@ucsf.edu)) or N.J. ([natalia.jura@ucsf.edu](mailto:natalia.jura@ucsf.edu))

29 **Abstract**

30

31 The Human Epidermal Growth Factor Receptor 2 (HER2) and HER3 form a potent pro-  
32 oncogenic heterocomplex upon binding of growth factor neuregulin-1 $\beta$  (NRG1 $\beta$ )<sup>1-3</sup>. The  
33 mechanism by which HER2 and HER3 interact remains unknown in the absence of any  
34 structures of the complex. We isolated the NRG1 $\beta$ -bound near full-length HER2/HER3 dimer  
35 and obtained a 2.9Å cryo-electron microscopy (cryo-EM) reconstruction of the extracellular  
36 domain module which reveals unexpected dynamics at the HER2/HER3 dimerization interface.  
37 We show that the dimerization arm of NRG1 $\beta$ -bound HER3 is unresolved likely because the  
38 apo HER2 monomer fails to undergo a ligand-induced conformational change needed to  
39 establish a HER3 dimerization arm binding pocket. In a second structure of an oncogenic  
40 extracellular domain mutant of HER2, S310F, we observe a compensatory interaction with the  
41 HER3 dimerization arm that stabilizes the dimerization interface. We show that both  
42 HER2/HER3 and HER2-S310F/HER3 retain the capacity to bind to the HER2-directed  
43 therapeutic antibody, trastuzumab, but the mutant complex does not bind to pertuzumab. Our  
44 3.5Å structure of the HER2-S310F/HER3/NRG1 $\beta$ /trastuzumab Fragment antigen binding  
45 (Fab) complex shows that the receptor dimer undergoes a conformational change to  
46 accommodate trastuzumab. Thus, like oncogenic mutations, therapeutics exploit the intrinsic  
47 dynamics of the HER2/HER3 heterodimer. The unique features of a singly liganded  
48 HER2/HER3 heterodimer underscore the allosteric sensing of the ligand occupancy by the  
49 dimerization interface and explain why extracellular domains of HER2 do not homo-associate  
50 via canonical active dimer interface.

51

## 52 Introduction

53 HER2 and HER3 are members of the HER/ErbB family of receptor tyrosine kinases (in  
54 addition to EGFR and HER4) that convert the binding of extracellular growth factor ligands  
55 into the activation of the intracellular kinase domains. Point mutations and HER2  
56 overexpression have been firmly established as oncogenic in breast, lung, bladder and other  
57 tissues, and mutations in HER3 have been identified in colon and gastric cancers<sup>4-11</sup>. HER3  
58 upregulation is also a major mechanism underlying resistance to anti-HER2 treatments<sup>12,13</sup>. To  
59 form an active complex, HER receptors dimerize upon binding to growth factor ligands. HER2  
60 is uniquely unable to bind to known growth factors and thus dependent on heterodimerization  
61 with other HER receptors for activation and signaling. The preferred dimerization partner of  
62 HER2 is HER3, which binds growth factors from the neuregulin (NRG) family<sup>1-3</sup>. Like HER2,  
63 HER3 is an obligate heterodimer partner, because it has a catalytically impaired kinase domain  
64 (a pseudokinase) and cannot support its own phosphorylation<sup>14,15</sup>.

65 In the absence of any high-resolution structures of the HER2/HER3 heterocomplex, our  
66 current molecular understanding of its activation is mostly inferred from structural studies of  
67 the related receptors, EGFR and HER4. On the intracellular side, all HER receptors are  
68 composed of short juxtamembrane segments, kinase domains and long unstructured tails. Upon  
69 activation, the pseudokinase domain of HER3 is predicted to allosterically activate the HER2  
70 kinase to initiate downstream signaling<sup>16,17</sup> (**Fig. 1a**). On the extracellular side, HER receptors  
71 are composed of four domains (I-IV). Domain II contains the dimerization arm, a key structural  
72 element at the dimerization interface (**Fig. 1a**). In the absence of ligand, the dimerization arm  
73 is obscured in the inactive “tethered” conformation, as seen in structures of EGFR, HER3 and  
74 HER4, by an intramolecular interaction between domains II and IV<sup>18-20</sup>. A critical function of  
75 ligand binding is to break the tether and stabilize an extended conformation that exposes the  
76 dimerization arm (**Fig. 1a**). While no structures of ligand-bound HER3 have been solved,

77 EGFR and HER4 have been observed in the ligand-bound extended conformation with an  
78 exposed dimerization arm which contacts a pocket formed between domains I and III of the  
79 other monomer<sup>21-23</sup>. The resulting active extracellular domain dimers of EGFR and HER4 are  
80 largely symmetric, stabilized by the binding of two growth factor molecules, with the  
81 dimerization arm of each monomer providing significant interaction surfaces<sup>21-24</sup>.

82 The orphan receptor HER2 is found in an extended conformation in all current  
83 structures despite lacking bound growth factor ligands<sup>25,26</sup>. In contrast to EGFR and HER4,  
84 however, homodimeric interactions mediated by the extended extracellular domain of HER2  
85 have not been observed even though its dimerization arm is constitutively exposed. It has been  
86 proposed that the existing extended HER2 extracellular domain structures are in a  
87 constitutively autoinhibited conformation due to their similarities with the inactive structures  
88 of EGFR<sup>27</sup>. Whether HER2 adopts a different, “active” conformation when it binds other HER  
89 receptors, and what this conformation may look like, remains a mystery. The stabilization of  
90 such HER2-containing complexes by the binding of only one growth factor stands in contrast  
91 to all known high-resolution structures of the active EGFR and HER4 receptor extracellular  
92 domain homodimers. In this study, we used cryo-EM to gain structural insights into the  
93 formation of the active HER2/HER3 complex, the activation mechanism of extracellular  
94 domain cancer mutations, and the binding of the heterocomplex to existing HER2-directed  
95 therapeutics.

96

## 97 **Results**

### 98 **Intracellular domains stabilize the ligand-induced extracellular domain interactions in** 99 **the HER2/HER3 complex but are structurally labile**

100 Previous biophysical studies on the isolated receptor extracellular domain fragments of  
101 HER2 and HER3 did not yield stable heterodimeric complexes in the presence of NRG

102 ligands<sup>28</sup>. We hypothesized that the transmembrane and intracellular kinase domains might  
103 contribute to the stabilization of extracellular domain interactions, allowing us to reconstitute  
104 the HER2/HER3 heterodimeric complex. We expressed near-full length HER2 receptors in the  
105 presence of the covalent kinase inhibitor canertinib<sup>29</sup> and HER3 receptors with only their  
106 unstructured intracellular C-terminal tails truncated (see **Methods, Extended Data Fig. 1**).  
107 After extensive optimization, we were able to obtain the NRG1 $\beta$ -bound near full-length  
108 complexes of HER2/HER3 solubilized in detergent in sufficient amounts and homogeneity for  
109 cryo-EM. A critical factor for reaching the necessary yields was the inclusion of cancer-  
110 associated mutations in the HER3 pseudokinase domain, which we have previously shown  
111 increase HER3 dimerization affinity with EGFR<sup>17</sup>. Another major enabling technology was the  
112 use of graphene oxide coated holey carbon grids that enabled solving our high-resolution cryo-  
113 EM structures at low receptor concentrations<sup>30,31</sup>. While the transmembrane and intracellular  
114 kinase domains are essential for the stabilization of the extracellular domain interactions  
115 between HER2 and HER3, they do not appear to be rigidly connected to the extracellular  
116 domains, and their inclusion in the cryo-EM reconstructions of all three states ultimately  
117 limited the resolution of the full-length receptor heterodimer structures (**Extended Data Fig.**  
118 **1**). However, focusing on the extracellular domain yielded a 2.9Å structure of the  
119 HER2/HER3/NRG1 $\beta$  extracellular domain complex (**Fig. 1b, Extended Data Fig. 2**).

120

## 121 **Structure of the asymmetric HER2/HER3 dimer reveals that the dimerization arm of** 122 **HER3 is disengaged**

123 In the cryo-EM reconstruction of the HER2/HER3/NRG1 $\beta$  extracellular domain  
124 module, HER2 and HER3 assemble in a “heart-shaped” dimer, resembling a conformation  
125 similar to that of the known ligand-stabilized EGFR and HER4 extracellular domain  
126 homodimers<sup>21-24,32</sup> (**Extended Data Fig. 3** and **Extended Data Fig. 4**). Active EGFR

127 extracellular dimers have been observed in highly symmetric complexes when bound to high  
128 affinity ligands such as EGF and in slightly asymmetric complexes when bound to lower  
129 affinity ligands such as epiregulin (EREG)<sup>21-24,32</sup>. The HER2/HER3/NRG1 $\beta$  complex  
130 represents a conformationally distinct HER receptor dimer with the highest degree of  
131 asymmetry (**Extended Data Fig. 3** and **Extended Data Fig. 4**). Membrane-proximal domains  
132 IV are visualized at lower resolution for both receptors (Extended Data Fig. 2) indicating their  
133 flexibility, as observed in EGFR and HER4<sup>22-24,33</sup>. Our structure features the previously  
134 uncharacterized extended state of the HER3 extracellular domain, with NRG1 $\beta$  clearly  
135 resolved in the density (**Fig. 1b,c**). NRG1 $\beta$  engages with HER3 primarily through an extensive  
136 interaction network at its C-terminus (total buried surface area: 2,666 Å<sup>2</sup>) stabilized by salt  
137 bridges between R207 (NRG1 $\beta$ ) and D112 in HER3 domain I, and R220 (NRG1 $\beta$ ) and D365  
138 in HER3 domain III, bringing domains I and III into close proximity (**Fig. 1c**). Many of the  
139 contacts between NRG1 $\beta$  and HER3 are conserved in the NRG1 $\beta$ -bound HER4 complex  
140 (**Extended Data Fig. 3**).

141 Like HER3, HER2 adopts an extended conformation in the dimer. This conformation  
142 is almost identical to the one previously seen in structures of monomeric HER2 (**Extended**  
143 **Data Fig. 3**) (RMSD: 1.01 Å (1N8Z), 0.74 Å (1N8Y), 0.97 Å (6OGE))<sup>25,26</sup>. As previously  
144 noted, this conformation differs from the extended conformations of other HER receptors  
145 especially in the curvature of domain II, the presentation of the dimerization arm and the  
146 relative orientation of domains I and III. Our structure provides evidence that this atypical  
147 extended state of HER2 is readily accommodated in the active HER2/HER3 dimer,  
148 contradicting the hypothesis that HER2 needs to undergo additional conformational changes in  
149 order to engage with other HER receptors in active dimers<sup>27</sup>.

150 The most striking feature of the HER2/HER3/NRG1 $\beta$  complex is the lack of resolvable  
151 density for the HER3 dimerization arm in domain II (**Fig. 1e**). This is surprising because in all

152 other structures of active HER receptor extracellular domain dimers, the dimerization arms of  
153 both receptors provide essential contributions to the dimerization interface. In contrast, only  
154 the HER2 dimerization arm is resolved in the HER2/HER3/NRG1 $\beta$  structure and interacts with  
155 HER3 through a number of key sidechain-backbone and backbone-backbone interactions  
156 between HER2-Y274/HER3-G283, HER2-Y274/HER3-R301, HER2-T278/HER3-R303 and  
157 HER2-F279/HER3-R303 (**Fig. 1d**). Apart from the dimerization arm-mediated polar  
158 interactions, domain II of HER2 interacts with domain II of HER3 via six additional hydrogen  
159 bonds, which while fewer, are similarly positioned to those seen in extracellular crystal  
160 structures of other HER receptors (**Fig. 1d, Extended Data Fig. 4**). Consequently, the total  
161 buried surface area at the HER2/HER3 heterodimer interface (1,821  $\text{\AA}^2$ , domains I-III only) is  
162 reduced compared to that of other HER homodimers (2,773  $\text{\AA}^2$  for EGFR homodimer bound  
163 to EGF, 2,135  $\text{\AA}^2$  for EGFR homodimer bound to EREG and 2,673  $\text{\AA}^2$  for HER4 homodimer  
164 bound to NRG1 $\beta$ )<sup>23,24</sup>.

165

### 166 **Ligand binding mode determines the extent of dimerization arm engagement**

167 One possible explanation for why we do not observe the dimerization arm of HER3 in  
168 our structure is that HER2 does not have a suitable binding pocket to engage the HER3  
169 dimerization arm. In the symmetric, EGF-bound EGFR extracellular domain dimers each  
170 protomer cradles the dimerization arm of the other protomer via an enclosed binding pocket.  
171 In comparison, domain I/III interface in HER2 does not fully close, which compromises the  
172 binding pocket for the HER3 dimerization arm (**Fig. 2a**). We investigated whether such a  
173 weakened, open pocket is a unique feature of HER2 by analyzing known crystal structures of  
174 other HER receptor ectodomains (**Fig. 2a**). We noticed that in the asymmetric structure of the  
175 EREG-bound EGFR ectodomain dimer, the dimerization arm-binding pocket was also open,  
176 although only partially, and only in one receptor monomer<sup>32</sup> (**Fig. 2a, middle**). While both

177 dimerization arms were resolved in the EGFR/EREG structure, they displayed significantly  
178 different B-factors and were differentially engaged. The dimerization arm engaged with the  
179 partially open binding pocket was more dynamic and formed only a single hydrogen bond with  
180 the dimerization partner (**Fig. 2b, Extended Data Fig. 4**). The disengagement of this  
181 dimerization arm represents an intermediate state between the missing dimerization arm of  
182 HER3 in our structure, and the fully engaged dimerization arms, both displaying low B-factors,  
183 in the symmetric EGFR/EGF ectodomain dimer (**Fig. 2b**).

184         What determines the conformation of the dimerization arm-binding pocket? Our  
185 analysis points to its previously unappreciated allosteric connection with the ligand binding  
186 site. Thus far, two modes of ligand binding to HER receptors have been described: fully-  
187 wedged and partially-wedged<sup>32</sup>. These modes are differentiated based on the relative rotation  
188 between domains I and III induced by ligand binding. The fully-wedged conformation, as seen  
189 in the symmetric EGFR/EGF, EGFR/TGF $\alpha$  and HER4/NRG1 $\beta$  dimer structures, is  
190 characterized by a  $\sim 31^\circ$  rotation between domains I and III (the reference point is the angle  
191 between domains I and III in HER2). The partially-wedged ligand conformation, as seen in  
192 EGFR/EREG and *Drosophila* EGFR/Spitz structures, is associated with a smaller  $\sim 23^\circ$   
193 rotation. These different conformations directly correlate with the state of the dimerization arm-  
194 binding pocket on the other side of the receptor (**Fig. 2c**). A fully-wedged ligand results in the  
195 formation of a closed high affinity dimerization arm-binding pocket. Consequently, the HER3  
196 monomer, which in our structure has a fully-wedged ligand with the associated large rotation  
197 of domains I and III, provides a high affinity pocket for the HER2 dimerization arm. Partial  
198 ligand-wedging results only in partial closure of the dimerization arm-binding pocket, and  
199 hence the increased dynamics of the dimerization arm presented by the dimerization partner as  
200 seen in one monomer of the EREG/EGFR dimer<sup>32</sup>. In HER2, which does not bind a ligand,  
201 domains I and III do not undergo a relative rotation, and consequently the dimerization arm-



202 binding pocket is fully open and does not engage the HER3 dimerization arm in our structure  
203 (**Fig. 2a, c**).

204 The conformational coupling between bound ligand and dimerization arm binding  
205 pocket explains why solution and structural studies of the extracellular domains of HER2 have  
206 been unable to identify homodimers despite HER2 being always in an extended conformation  
207 with the dimerization arm exposed<sup>25,26,34</sup>. Our structure shows that because the ligand-free  
208 extracellular domain of HER2 does not undergo a necessary rotation between domains I and  
209 III, it cannot establish a binding pocket for the partner's dimerization arm. Therefore, the  
210 extracellular domains of HER2 are effectively protected from homo-association. However,  
211 HER2 can bind ligand-bound HER receptors, in which the dimerization arm-binding pocket is  
212 established and can engage the HER2 dimerization arm.

213

### 214 **The most common oncogenic HER2 variant enhances heterodimerization by stabilizing** 215 **the dimerization arm of HER3**

216 The most frequent cancer-associated missense mutation in HER2 is localized in the domain II  
217 of the extracellular domain and changes serine 310 to a phenylalanine or a tyrosine (S310F/Y).  
218 This mutant variant of HER2 found in cancers without HER2 overexpression enhances  
219 anchorage-dependent colony formation, HER2-dependent autophosphorylation, and is strongly  
220 proliferative<sup>35,36,4</sup>. Interestingly, S310 is located in the direct vicinity of the dimerization arm-  
221 binding pocket in HER2. To test if this mutant may influence the interactions between HER2  
222 and HER3, we expressed, purified and reconstituted a nearly full-length HER2-  
223 S310F/HER3/NRG1 $\beta$  complex *in vitro*. When compared to the wild type HER2, significantly  
224 more HER2-S310F was captured by HER3 immobilized on NRG1 $\beta$ -bound beads (**Extended**  
225 **Data Fig. 5**) suggesting that the mutation substantially stabilizes the HER2/HER3 heterodimer.

226 We obtained a cryo-EM reconstruction of the extracellular module of the HER2-  
227 S310F/HER3/NRG1 $\beta$  complex at 3.1Å resolution (**Fig. 3a, Extended Data Fig. 6**). While the  
228 structure closely resembles that of the complex containing wild type HER2 with no  
229 conformational changes in the HER2 monomer (RMSD: 0.1 Å), remarkably, the HER3  
230 dimerization arm was entirely resolved in the mutant complex (**Fig. 3a,b**). The main stabilizing  
231 interaction involves  $\pi$ - $\pi$  stacking between the introduced phenylalanine at position 310 (HER2-  
232 F310) and HER3-Y265 (**Fig. 3c**). This new interaction also positioned the HER3 dimerization  
233 arm such that stabilizing polar contacts formed between the HER3-Y265 sidechain hydroxyl  
234 group and the backbones of HER2-F290 and HER2-C311 (**Fig. 3c**). The stabilized HER3  
235 dimerization arm increases the total buried surface area at the HER2/HER3 interface (domains  
236 I-III) from 1,821 Å<sup>2</sup> in the wild type complex to 3,054 Å<sup>2</sup> in the mutant complex, which is even  
237 higher than the respective interfaces in structures of the symmetric ligand-bound EGFR and  
238 HER4 homodimers (**Extended Data Fig. 4**)<sup>23,24</sup>. We predict that the same mechanism is  
239 employed by the HER2 S310Y mutation, which is assumed to form an analogous  $\pi$ - $\pi$  stacking  
240 interaction with HER3 Y265 and similarly stabilize the heterocomplex by engaging the HER3  
241 dimerization arm. Thus, the most common HER2 oncogenic mutations act by stabilizing  
242 interactions with the HER3 dimerization arm and compensate for the inability of HER2 to  
243 undergo a needed rotation between domains I and III.

244

#### 245 **The HER2/HER3 heterodimer accommodates trastuzumab and pertuzumab Fabs**

246 The clinically-approved HER2-targeting monoclonal antibodies, trastuzumab and  
247 pertuzumab, target domains IV and II, respectively<sup>25,37</sup>. To assess if these therapeutic agents  
248 also bind the HER2/HER3 heterocomplex, we incubated NRG1 $\beta$ -stabilized HER2/HER3  
249 heterodimers with an excess of trastuzumab or pertuzumab Fab, followed by HER2 affinity  
250 purification and evaluation of bound HER3 and Fab levels. We found that neither trastuzumab

251 nor pertuzumab interfered with HER2/HER3 heterodimerization and could be found associated  
252 with the receptor dimers as ternary complexes (**Fig. 4a**).

253         The ability of the HER2/HER3 complex to associate with trastuzumab is rationalized  
254 by our cryo-EM reconstruction of the trastuzumab Fab bound to the HER2-S310F/HER3  
255 heterodimer that we obtained at 3.5Å resolution (**Fig. 4b, Extended Data Fig. 7**). Our structure  
256 shows that the HER2/HER3 heterodimer rearranges in multiple regions to accommodate  
257 trastuzumab binding to domains II and IV. Specifically, domain IV of HER2 moves away from  
258 HER3 as a rigid body with the variable domains of trastuzumab. In addition, HER3 rotates in  
259 relation to HER2 to resolve a steric clash between HER3 domain III and the constant domains  
260 of the trastuzumab Fab (**Extended Data Fig. 8, Fig. 4c**). Thus, minor structural rearrangements  
261 and the previously noted flexibility in domain IV underlie trastuzumab binding to the  
262 HER2/HER3 heterodimer.

263         Our observation that pertuzumab binds to the HER2/HER3/NRG1β complex is less  
264 straightforward albeit possible to rationalize. Pertuzumab docked into the structure of the  
265 HER2/HER3/NRG1β heterodimer clashes with the domain II of HER3, directly blocking the  
266 extracellular domain dimerization interface (**Extended Data Fig. 8**). With pertuzumab bound,  
267 the extracellular domains of HER2 and HER3 are unlikely to interact. Thus, the fact that  
268 pertuzumab still does not interfere with HER2/HER3 dimers emphasizes the important role the  
269 intracellular receptor domains play in stabilizing the interaction between HER2 and HER3. We  
270 were unable to obtain high resolution reconstruction of the pertuzumab-bound extracellular  
271 domain module of the HER2/HER3/NRG1β heterocomplex which supports the notion that  
272 pertuzumab binding increases its dynamics.

273         Similar to the wild type HER2/HER3/NRG1β complex, the presence of trastuzumab or  
274 pertuzumab did not affect assembly of the mutant HER2-S310F/HER3/NRG1β complex (**Fig.**  
275 **4a**). However, in a stark contrast to the wild type complex, the mutant complex did not bind to

276 pertuzumab. This could be explained by direct interference of the S310 mutation with the Fab  
277 binding (**Extended Data Fig. 8**). It is also possible that the HER2 epitope recognized by  
278 pertuzumab is occluded in the mutant complex due to the enhanced extracellular domain  
279 dimerization interface (**Extended Data Fig.8**). Thus, our work suggests that pertuzumab may  
280 be less effective than trastuzumab at targeting cancers driven by HER2-S310F/Y.

281

## 282 **Discussion**

283 The HER2/HER3/NRG1 $\beta$  captures two obligate heterodimeric HER receptors in an active state  
284 revealing the previously unseen ligand-bound extended state of HER3 engaging the ligand-free  
285 HER2. Our structure expands on the repertoire of ligand-bound states of human HER receptors  
286 by representing the first heterodimeric complex of HER extracellular domains and the first  
287 singly-liganded human HER dimer. A singly-liganded dimer was previously seen only in  
288 *Drosophila* EGFR<sup>38</sup>, and was suggested to represent a more stable active complex than a  
289 doubly liganded one. To the contrary, we observe that the singly liganded HER2/HER3  
290 complex is more dynamic compared to other solved HER receptor extracellular domain dimer  
291 structures, to the extent that one dimerization arm is not even engaged at the dimerization  
292 interface. The increased dynamics are rationalized by allosteric coupling between the growth  
293 factor-binding pocket and the dimerization arm-binding pocket within the same receptor  
294 molecule. The resulting closure of the ligand binding pocket during the transition from a fully-  
295 wedged ligand bound state, as observed in HER3, to the apo state, as seen in HER2, leads to a  
296 gradual decrease in the ability of a receptor to interact with the dimerization arm of its partner.  
297 As shown in our structure, ligand-less HER2 cannot in fact bind the dimerization arm of HER3.  
298 Such a destabilized dimerization arm interface has been previously observed in molecular  
299 dynamics simulations of the putative EGFR-HER2 ECD dimer, underlining the generalizability  
300 of our findings to other HER2-containing heterocomplexes<sup>39</sup>. Furthermore, this allosteric

301 model posits that ligands which bind HER receptors in partially-wedged conformations will  
302 increase dynamics at the dimerization interface. Indeed, this is the case for the low affinity  
303 ligands of EGFR, like EREG and epigen (EPGN)<sup>32</sup>.

304 Our findings demonstrate that HER2 does not undergo a significant conformational  
305 change when it complexes with HER3, suggesting that the constitutively extended state,  
306 previously deemed as autoinhibited<sup>27</sup>, is in fact dimerization-competent. However, in order to  
307 dimerize, HER2 relies on co-receptors to engage its dimerization arm while HER2 itself cannot  
308 reciprocate. This is likely because the constitutively closed growth factor binding pocket in  
309 HER2 leads to the loss of an allosteric connection to its own dimerization arm binding pocket.  
310 Thus, the HER2 extracellular domain is specifically autoinhibited towards self-association but  
311 receptive to heterodimerization.

312 Our structure of the mutant HER2-S310F/HER3 heterocomplex reveals how cancer  
313 subverts the intrinsic dynamics at the HER2-containing extracellular heterodimer interface  
314 leading to an aberrantly stabilized heterodimer, a fundamentally new mechanism of driving  
315 aberrant HER2 signaling. We envision that such mutations would cooperate with growth factor  
316 binding to HER2 dimerization partners (like HER3) to promote the dimerization-arm exposed  
317 extended conformation of the partner receptor which would in turn be further stabilized by the  
318 mutant HER2. The notable dynamics at the interface likely also accounts for the ability of the  
319 wild-type HER2/HER3/NRG1 $\beta$  heterocomplex to accommodate both trastuzumab and  
320 pertuzumab binding *in vitro*. Our structure of the trastuzumab-bound HER2-  
321 S310F/HER3/NRG1 $\beta$  reveals how the heterodimer overcomes a steric clash to accommodate  
322 the trastuzumab Fab. Finally, our results show that the HER2-S310F/HER3 complex resists  
323 pertuzumab binding, which is of therapeutic significance. The HER2/HER3 structures  
324 presented here provide a long-awaited platform for the rational design of therapeutics and  
325 biomarkers specific to the active states of these receptors and their complexes.

## 326 **AUTHOR CONTRIBUTIONS**

327 N.J. conceived of project and D.D., R.T., K.A.V., and N.J. designed the research approach.  
328 D.D. and R.T. performed all expression and purification, electron microscopy imaging and  
329 processing, structural modelling, and *in vitro* experiments. T.M.T. provided initial receptor  
330 expression constructs. F.W. and D.A. provided holey carbon graphene-oxide grids for cryo-  
331 EM. D.D., R.T, K.A.V., and N.J. wrote the manuscript.

332

## 333 **COMPETING INTERESTS**

334 N.J. is a member of the SAB and a shareholder of Turning Point Therapeutics, SUDO  
335 Biosciences and Type6 Therapeutics. The Jura laboratory has received sponsored research  
336 support from Genentech. Other authors do not declare competing interests.

337

## 338 **ACKNOWLEDGMENTS**

339 We thank A. Manglik for advice on receptor expression, and D. Bulkley, G. Gilbert, E. Tse,  
340 and Z. Yu from the UCSF EM facility. We also thank M. Moasser, S. Seshagiri, and members  
341 of the Verba and Jura labs for their helpful discussions, and E. Linossi and H. Torosyan for  
342 critical comments on the manuscript. We would also like to acknowledge D. Suveges for his  
343 experimental contributions to the generation of our first HER expression constructs. This work  
344 was funded through UCSF Program for Breakthrough Biomedical Research to K.V. and N.J.,  
345 NIH/NIGMS R35-GM139636 to N.J., Genentech research grant to N.J., DFG German  
346 Research Foundation GZ: TR 1668/1-1 to R.T. and NIH/NCI 1F30CA247147 to D.D.

347

348

349 **FIGURES**

350

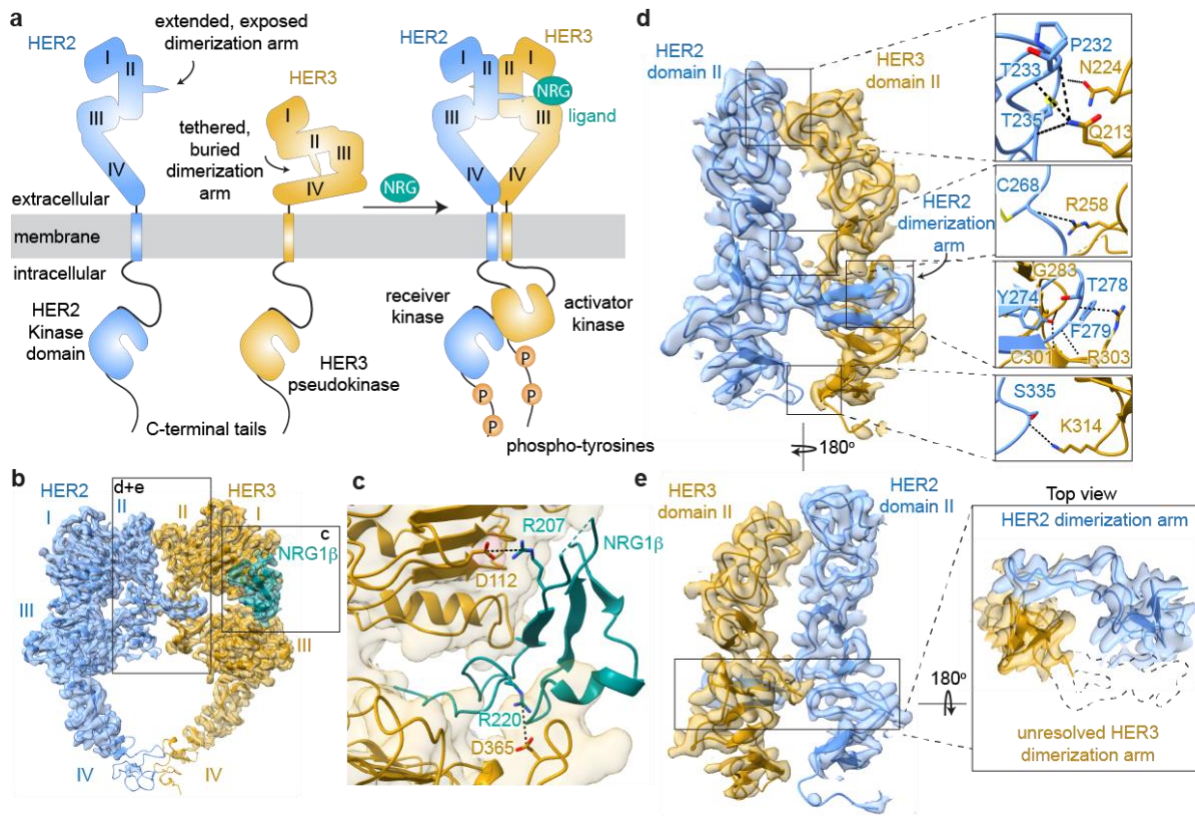

351

352 **Fig. 1 | Overall structure of the HER2/HER3/NRG1 $\beta$  extracellular domain complex. a,**

353 **Cartoon schematic of the conformational changes that the inactive HER2 and HER3 monomers**

354 **are predicted to undergo during heterodimerization in the presence of neuregulin-1 $\beta$  (NRG). b,**

355 **Cryo-EM map and the resulting structural model of the HER2/HER3/NRG1 $\beta$  extracellular**

356 **domain complex, with HER2 shown in light blue, HER3 in gold and NRG1 $\beta$  in teal. b,**

357 **Extracellular domains I-IV are marked on the structures. Boxes indicate insets magnified in c-**

358 **e. c, Detailed view of the NRG1 $\beta$  binding site on HER3. HER3 is shown in cartoon**

359 **representation and molecular surface, in gold. NRG1 $\beta$  is in teal. Salt bridges are shown in**

360 **dotted black lines. d, Detailed view of the dimerization interface between domains II of HER2**

361 **and HER3 with all polar contacts between receptors highlighted in the boxes on the right. e,**

362 **Same view as in d but rotated 180° to illustrate lack of density for the HER3 dimerization arm.**

363 An outline of the expected location of the HER3 dimerization arm based on previous

364 extracellular domain structures is shown as a dotted path in the top view.

365



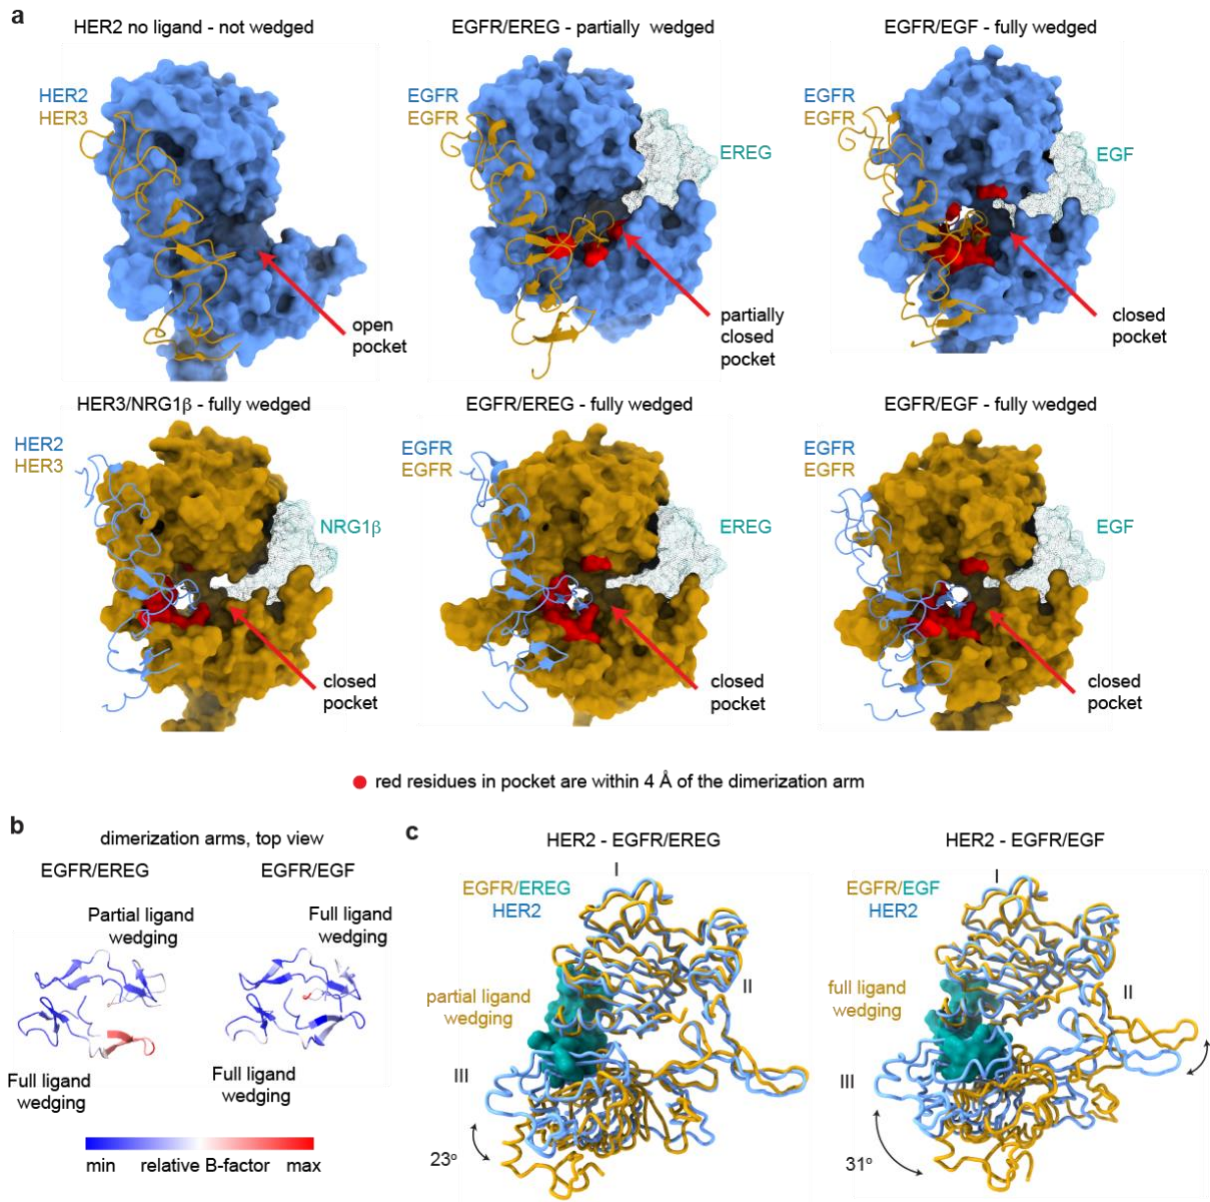

366

367 **Fig. 2 | Analysis of liganded HER receptor states reveals an allosteric mechanism of**

368 **dimerization arm engagement. a**, Left top panel - an open dimerization arm binding pocket

369 in the ligand-free HER2 does not engage HER3 dimerization arm in the HER2/HER3/NRG1 $\beta$

370 structure. Left bottom panel – closed binding pocket in HER3 engages the HER2 dimerization

371 arm in the same structure. Middle top panel – a partially closed dimerization arm binding

372 pocket in one of the monomers in the EGFR/EREG structure (PDB: 5WB7) in which the ligand

373 (EREG) is partially-wedged. Middle bottom panel - closed binding pocket in another monomer

374 in the same EGFR/EREG structure in which the ligand is fully-wedged. Right panel top and

375 bottom shows the identical conformations of both EGFR monomers in the EGFR/EGF dimer  
376 structure (PDB: 3NJP) in which the ligands (EGF) are fully wedged. Consequently, both  
377 dimerization arms are engaged. Residues within 4Å of the dimerization arm are shown in red.  
378 **b**, Top view of dimerization arms in the asymmetrically ligand-wedged EGFR/EREG and  
379 symmetrically ligand-wedged EGFR/EGF crystal structures indicating different values of B-  
380 factors (PDB: 5WB7 and 3NJP, respectively). **c**, Detailed view of domains I-III in the  
381 EGFR/EREG or EGFR/EGF crystal structures aligned on HER2 domain I in the structure of  
382 the HER2/HER3/NRG1 $\beta$  complex. The EGFR monomer in which the EREG ligand is only  
383 partially-wedged is shown. The extent of ligand wedging between domains I and III induces a  
384 graded rotation of domain III as compared to domain III of HER2.  
385

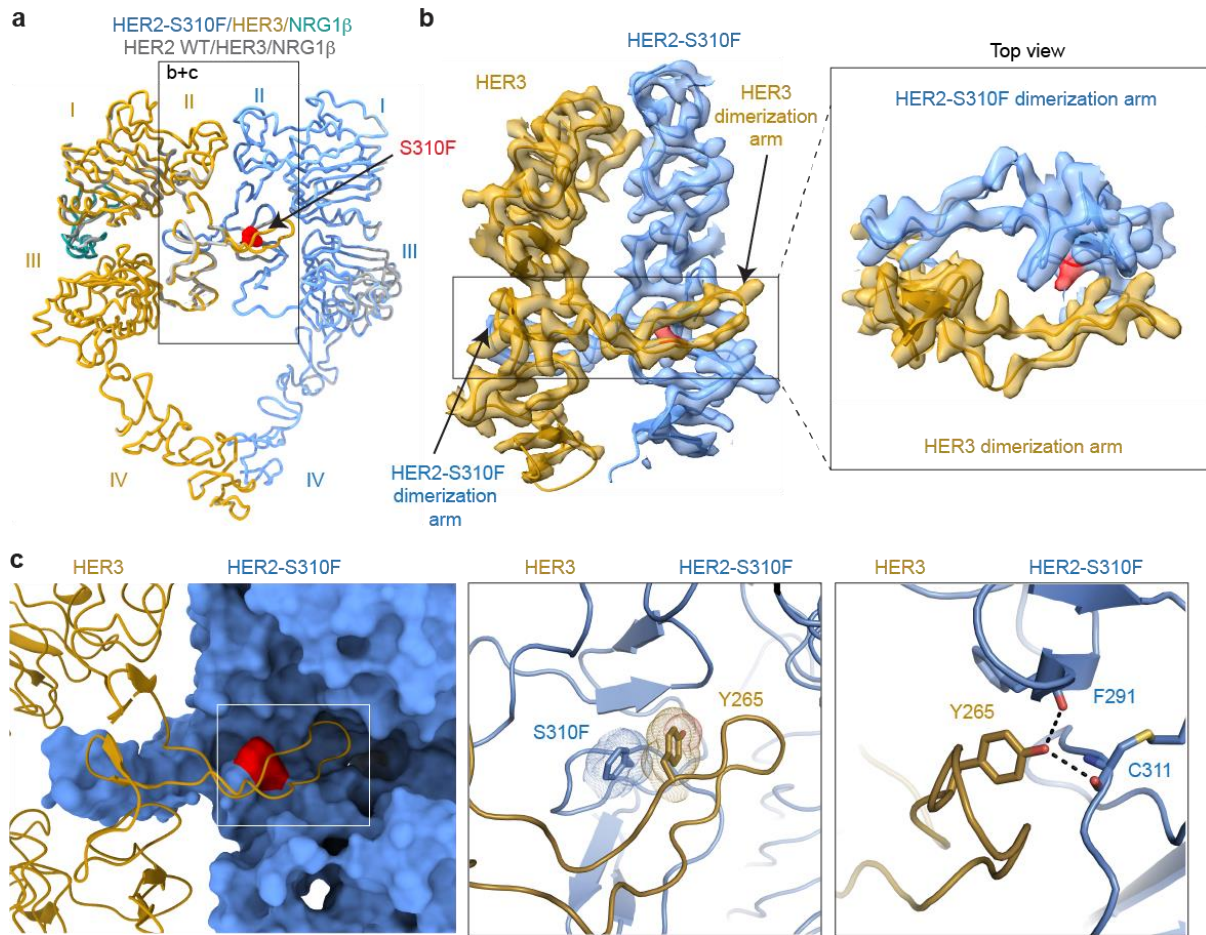

386

387 **Fig. 3 | HER2 oncogenic mutation S310F stabilizes the dimerization arm of HER3. a,**

388 Cryo-EM structure of HER2-S310F/HER3/NGR1 $\beta$  complex overlaid on

389 HER2/HER3/NGR1 $\beta$ . The HER2-S310F mutation is shown in red. **b,** Cryo-EM and

390 model zoomed in on domains II depict a resolved HER3 dimerization arm in the HER2-

391 S310F/HER3/NGR1 $\beta$  complex. Inset shows a top-down view of the HER2 and HER3

392 dimerization arms. **c,** Left panel, HER2-S310F monomer, shown in surface representation, pins

393 the HER3 dimerization arm, shown as cartoon, in the HER2 dimerization arm-binding pocket

394 despite its inability to close in the ligand-less HER2. Middle panel, HER2-S310F forms a  $\pi$ - $\pi$

395 interaction with HER3 Y265 that stabilizes the dimerization arm. Right panel, polar contacts

396 (dotted lines) between HER3 Y265 and the backbone residues of HER2 - F291 and C311.

397

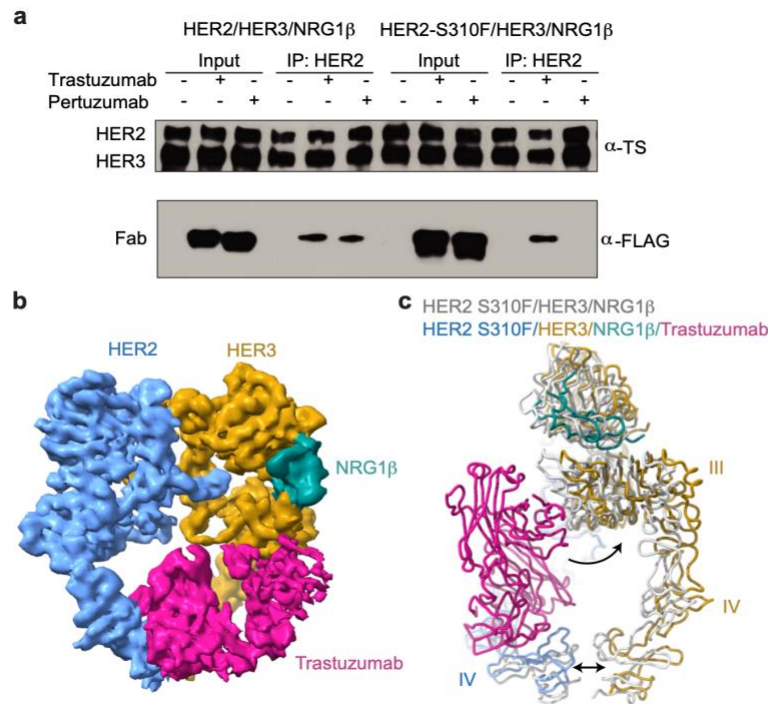

398

399 **Fig. 4 | The HER2/HER3/NRG1 $\beta$  structure accommodates trastuzumab binding. a,**

400 Representative Western blot of heterodimer pulldowns in the presence of a two-fold molar

401 excess of pertuzumab and trastuzumab FLAG-tagged Fabs. Pre-formed HER2/HER3/NRG1 $\beta$

402 heterocomplex binds both Fabs whereas HER2-S310F/HER3/NRG1 $\beta$  only binds the

403 trastuzumab Fab. TS – Twin Strep tag (present on both HER2 and HER3). **b**, 5Å lowpass

404 filtered density of the HER2-S310F/HER3/NRG1 $\beta$  heterocomplex bound to trastuzumab Fab.

405 **c**, Ribbon overlay of the HER2-S310F/HER3/NRG1 $\beta$  heterocomplex with (multi-color) and

406 without (light grey) trastuzumab Fab. The Fab pushes HER3 back relative to HER2 (curved

407 arrow) and spreads domains IV further apart (double-headed arrow).

408 **MATERIALS AND METHODS**

409

410 **NRG1 $\beta$  expression and purification.** An HRV-3C cleavable Thyrodoxin A (TrxA) was fused  
411 to the EGF-like domain of NRG1 $\beta$  (residues 177-236, NRG1 isoform 6 (UniProt: Q02297-6;  
412 numbering includes propeptide) with C-terminal Flag and 6x-Histidine tags and subsequently  
413 cloned into a p32A vector. The TrxA-3C-NRG1 $\beta$ -Flag-6xHis construct was transformed into  
414 Origami *E. coli*, grown at 37 °C in Terrific Broth in large scale culture until an OD of ~1.0 -  
415 1.5, and induced with 1 mM Isopropyl  $\beta$ -d-1-thiogalactopyranoside (IPTG) overnight at room  
416 temperature. Cells were harvested the next day, pelleted, flash frozen, and stored until  
417 purification. For the purification, cells were resuspended in NRG lysis buffer (50 mM Tris-  
418 HCl pH 7.4, 150 mM NaCl, 1 mM phenylmethylsulfonyl fluoride (PMSF), and protease  
419 inhibitors (eOComplete, Roche)) and sonicated until thoroughly lysed. Lysate was then  
420 clarified through ultracentrifugation, syringe filtered through 0.44  $\mu$ m filters and incubated  
421 with Ni-NTA resin overnight. The beads were washed by gravity through 20 column volumes  
422 (CVs) of NRG wash buffer (50 mM Tris-HCl pH 7.4, 150 mM NaCl) containing 20 mM  
423 imidazole, then 10 CVs of NRG wash buffer containing 50 mM imidazole, and finally eluted  
424 with 3 CVs of NRG wash buffer containing 300 mM imidazole. Imidazole in the eluate was  
425 reduced < 30 mM over a 10K concentrator and subsequent dilution with NRG wash buffer.  
426 The eluate was cleaved overnight with 3C protease at 4 °C. To remove cleaved TrxA, the  
427 elution was again applied on equilibrated Ni-NTA resin, incubated, washed, and eluted as  
428 described previously. The elution containing NRG1 $\beta$  was concentrated with a 3K cutoff and  
429 applied on an S200 10/300 increase column (GE Healthcare). Protein from the major peak was  
430 stored in aliquots at -80 °C for subsequent receptor purifications. Yields ranged from 5-10  
431 mg/L of culture.

432

433 **Trastuzumab and pertuzumab Fab expression and purification.** The Fragment antigen  
434 binding (Fab) heavy chain and light chain sequences encoding trastuzumab and pertuzumab  
435 were inserted into the pSVF4 vector. For each Fab, a 1x Flag tag was inserted after the heavy  
436 chain constant domain and a 6x-Histidine tag was inserted after the light chain constant domain.  
437 Constructs were transformed into BL21 gold *E. coli* and scaled up to 6L in 2xYT media under  
438 Ampicillin antibiotic selection. Cultures were grown at 37 °C until OD of 0.8 - 1.0, induced  
439 with 1 mM IPTG for 6 hrs at 37 °C, harvested by centrifugation, and stored at -80 °C. Cells  
440 were resuspended in 100 ml of lysis buffer (20 mM sodium phosphate pH 7.4, 500 mM NaCl  
441 with DNase I (Roche), 0.5 mM MgCl<sub>2</sub> and 1 mM PMSF). Cells were sonicated until fully lysed  
442 and resulting lysate was incubated at 65 °C for 30 minutes. The lysate was cooled on ice and  
443 spun down at 40,000 rpm for 60 minutes at 4 °C. The clarified lysate was loaded onto a Protein  
444 A column equilibrated in Buffer A (20 mM sodium phosphate pH 7.4, 500 mM NaCl), washed  
445 with 10 column volumes of Buffer A, and eluted in 100 mM acetic acid by fractionation into  
446 neutralizing buffer containing 20 mM Tris-HCl pH 9.0, 150 mM NaCl. Immediately following  
447 Protein A purification, eluent was concentrated and loaded onto a Superdex 200 10/300  
448 Increase column (GE Healthcare) equilibrated in a buffer containing 50 mM Tris-HCl pH 7.4,  
449 150 mM NaCl. Fractions corresponding to Fab were pooled and stored at 4 °C until needed.

450

451 **Near full-length receptor expression.** Human HER2 with a C-terminal tail truncation  
452 ( $\Delta$ 1030–1255) followed by maltose binding protein (MBP) and twin-strep tags was cloned into  
453 pFastBac with a CMV promoter. A single point mutation in the HER2 kinase domain, G778D,  
454 which confers Hsp90 independence<sup>40</sup>, was introduced to improve yields. Human HER3 with a  
455 C-terminal tail truncation ( $\Delta$ 1023 – 1342) followed by a twin-strep tag was cloned in pFastBac  
456 with a CMV promoter. Two oncogenic mutations that stabilize the asymmetric kinase domain  
457 dimer, Q709R and E928G, were introduced to further improve heterodimer yields<sup>11,17</sup>. The

458 HER2 and HER3 constructs were each transfected into 60 ml of Expi293 mammalian  
459 suspension (Life Technologies) cells cultured to  $4 \times 10^6$  cells/ml at 37 °C, 8% CO<sub>2</sub> following the  
460 standard expression protocol. 10 mM canertinib in DMSO was added 16 - 18 hrs post-  
461 transfection to a final concentration of 10 μM along with ExpiFectamine 293 Transfection Kit  
462 enhancers 1 and 2. Cells were harvested, flash frozen, and stored at -80 °C 24 hrs after the  
463 addition of enhancers. The same procedure was followed for HER2 in the presence and absence  
464 of S310F mutation.

465

466 **Heterodimer purification.** Cells were resuspended with the lysis buffer (50 mM Tris-HCl pH  
467 7.4, 150 mM NaCl, 1 mM NaVO<sub>3</sub>, 1 mM NaF, 1 mM EDTA, protease inhibitors (eOComplete,  
468 Roche), DNase I, and 1% DDM (Inalco)) and lysed for 2 hrs by gentle rocking at 4 °C. Lysate  
469 was clarified by centrifugation at 4,000g for 20 min at 4 °C. Purified EGF-like domain of  
470 NRG1β was incubated with G1 Flag Resin (Genscript) for 1 hr at 4 °C and serially washed 3x  
471 with Buffer A (50 mM Tris-HCl pH 7.4, 150 mM NaCl). Clarified HER2 and HER3 receptor  
472 lysates were mixed and incubated O/N in batch mode at 4 °C with NRG1β Flag beads. NRG1β  
473 Flag beads were serially 3x washed with Buffer A containing 0.5 mM DDM (Anatrace) and  
474 eluted with Buffer A containing 0.5 mM DDM and 250 μg/ml of Flag peptide (SinoBiological).  
475 The eluate was then applied to amylose resin in batch mode for 2 hrs, washed serially 3x with  
476 Buffer B (50 mM HEPES pH 7.4, 150 mM NaCl) containing 0.5 mM DDM and eluted with  
477 amylose elution buffer (Buffer B containing 0.5 mM DDM and 10 mM maltose) O/N at 4 °C.  
478 The eluate was concentrated to 0.4 ml with a 100-kDa concentrator (Amicon) and mildly  
479 crosslinked in 0.2% glutaraldehyde for 40 min on ice. The sample was loaded on a Superose6  
480 10/300 (GE Healthcare) pre-equilibrated with Buffer A containing 0.5 mM DDM and 0.5 ml  
481 fractions were collected. Peak fractions corresponding to heterodimer sample were pooled,  
482 concentrated down to ~20 μl with a 100-kDa concentrator, and flash frozen for grid preparation.

483 The same purification protocol was followed for HER2-S310F/HER3 heterocomplex. The  
484 HER2-S310F/HER3 + trastuzumab Fab complex sample was generated by incubating a 5x  
485 molar excess of Fab with the heterocomplex prior to crosslinking, gel filtration, and imaging.

486

487 **Electron microscopy sample preparation and imaging.** For negative stain EM, fractions  
488 corresponding to heterodimer were applied to negatively glow-discharged carbon coated  
489 copper grids, stained with 0.75% uranyl-formate, and imaged on an FEI-Tecnai T12 with an  
490 4k CCD camera (Gatan). The resulting negative stain micrographs were assessed for particle  
491 homogeneity and particle density. This analysis was used to determine the target concentration  
492 for cryo-EM with graphene oxide grids which typically require 2-5x negative stain  
493 concentrations.

494

495 For cryo-EM, 3  $\mu$ l of purified and concentrated heterodimer sample (as empirically determined  
496 by negative stain) was applied to graphene-oxide coated Quantifoil R1.2/1.3 300 mesh Au  
497 holey-carbon grids prepared as previously described<sup>30</sup>, blotted using a Vitrobot Mark IV (FEI)  
498 and plunge frozen in liquid ethane (no glow discharge, 30 second wait time, room temperature,  
499 100% humidity, 4-8 seconds blot time, 0 blot force).

500

501 Grids were imaged on a 300-keV Titan Krios (FEI) with a K3 direct electron detector (Gatan)  
502 and a BioQuantum energy filter (Gatan). Data for HER2/HER3/NRG1 $\beta$  and HER2-  
503 S310F/HER3/NRG1 $\beta$  were collected in super-resolution mode at a physical pixel size of  
504 0.835 $\text{\AA}$ /pix with a dose rate of 8.0  $e^-$  per pixel per second (operated in CDS mode). Images  
505 were recorded with a 5.9 s exposure over 118 frames with a dose rate of 0.57  $e^-/\text{\AA}^2/\text{frame}$ . Data  
506 for HER2-S310F/HER3/NRG1 $\beta$  with trastuzumab Fab were collected in super-resolution pixel



507 mode at a physical pixel size of 0.834Å/pix with a dose rate of 8.0 e<sup>-</sup> per pixel per second.

508 Images were recorded in 6 s exposures over 120 subframes with a dose rate of 0.55 e<sup>-</sup>/Å<sup>2</sup>/frame.

509

510 **Image processing and 3D reconstruction.** Raw movies were corrected for motion and

511 radiation damage with MotionCor2<sup>41</sup> and the resulting sums were imported in CryoSPARC2<sup>42</sup>.

512 To account for the reduced GO coverage with detergent sample, all datasets underwent strict

513 micrograph curation with a final yield of ~40-50% of the collected micrograph stack.

514 Micrograph CTF parameters were estimated with the patch CTF job in CryoSPARC2. Particles

515 were picked through template picking with the extracellular domain volume of HER4 (PDB

516 ID: 3U7U) low-pass filtered to 25Å, the resulting picks were extracted with 2x Fourier

517 cropping and subjected to iterative rounds of *ab initio* and heterogeneous refinements. Once

518 reasonable reconstructions were obtained (as judged by the FSC (Fourier Shell Correlation)

519 curves shape), unbinned particles were re-extracted and run through subsequent rounds of

520 heterogeneous and non-uniform refinements to achieve reconstructions with the highest

521 resolution. The final reconstruction of HER2/HER3/NRG1β used for model building included

522 123,173 particles with C1 symmetry and resulted in an overall resolution of 2.9Å by Gold

523 Standard-Fourier Shell Correlation (GS-FSC) cutoff of 0.143. The final reconstruction of

524 HER2-S310F/HER3/NRG1β used for model building included 99,755 particles with C1

525 symmetry and attained a GS-FSC resolution of 3.1Å.

526

527 HER2-S310F/HER3/NRG1β/Trastruzumab Fab data set was initially processed as above in

528 CryoSPARC2. To address incomplete Fab occupancy, a stack containing 330,000 particles was

529 imported into RELION3<sup>43</sup> and subclassified through skip-align classification. Particles

530 classified into reconstructions without Fab density were removed from the particle stack. A

531 final particle stack from RELION3 containing 243,376 particles was re-imported into

532 CryoSPARC2 and subjected to non-uniform refinement to produce a reconstruction with a final  
533 resolution of 3.45Å.

534

535 Each map was assessed for local and directional resolutions through ResMap<sup>44</sup> and 3DFSC<sup>45</sup>  
536 server respectively. For all reconstructions, extracellular domains I-III achieved the highest  
537 local resolutions (~3Å) while that of domain IV varied from 4-8Å suggesting that a high degree  
538 of flexibility exists closer to the transmembrane domains. All reconstructions achieved a  
539 sphericity > 0.9.

540

541 To recover micelle and sub-micelle densities, 2x binned particle stacks for  
542 HER2/HER3/NRG1β and HER2-S310F/HER3/NRG1β were imported into RELION3 and  
543 further 3D-classified. Particles classified into 3D classes with substantial micelle densities were  
544 re-extracted with shifted coordinates (PyEM<sup>46</sup>) on the center of the micelle and refined.  
545 Resulting reconstructions featured convincing sub-micelle density with volumes large enough  
546 to accommodate transmembrane domains and kinases.

547

548 **Model refinement and validation.** An initial model was generated by docking HER2 (PDB  
549 ID: 1N8Z) with a homology model of liganded HER3 from its closest homolog, HER4, in  
550 SwissProt (PDB ID: 3U7U) into the HER2-S310F/HER3/NRG1β map. Given the substantial  
551 variation in domain IV local resolution, domain IV was truncated from the model and domains  
552 I-III were iteratively rebuilt in Rosetta<sup>47</sup>. Top scoring models were selected and further edited  
553 in Coot<sup>48</sup> and ISOLDE<sup>49</sup>. Domains IV were then placed into the model (HER2 PDB ID: 6OGE,  
554 HER3 PDB ID: 1M6B) and fit into the density with a FastRelax Rosetta protocol in torsion  
555 space. For HER2-S310F/HER3/NRG1β + trastuzumab Fab, the Fab (PDB ID: 6OGE) was  
556 torsion relaxed with the HER2-S310F/HER3/NRG1β model in Rosetta.

557

558 For glycan building, glycans were initially manually placed into the density in Chimera<sup>50</sup> and  
559 then were refined with the Rosetta glycan refinement protocol<sup>51</sup>. Model statistics were routinely  
560 assessed in PHENIX<sup>52</sup> and glycan geometries were cross validated in Privateer<sup>53</sup>. All structures  
561 were deposited into the EMDB and Protein Data Bank (PDB).

562

563 **Small-scale heterodimer pulldowns and Western Blot.** Tagged HER2 and HER3 expression  
564 constructs were co-transfected into 2 ml cultures of Expi293 cells as described above. Cell  
565 pellets were lysed in 1 ml lysis buffer and clarified lysates were subjected to NRG-pulldown  
566 and eluted in 250 µl Flag elution buffer as described above. The extent of heterodimer  
567 formation was assessed by Western blot. Samples were boiled in SDS-loading buffer at 95 °C  
568 for 5 min, run on 4-15% acrylamide gels and transferred onto PVDF membranes. Membranes  
569 were blocked in 3% BSA in TBS with 0.1% Tween (TBST) overnight and incubated with Step-  
570 Tactin HRP (IBA, 1:5000) in TBST + 3% BSA for 1 hr at room temperature. Membranes were  
571 washed 5x with TBST and signal was detected using ECL Western Blotting detection reagent  
572 (GE) or ECL prime (VWR).

573

574 **Trastuzumab and pertuzumab pulldown assay.** Wild-type HER2 and S310F HER2  
575 heterodimeric complexes with HER3 were expressed and purified as described above until  
576 elution from amylose resin with the exception that amylose wash and elution buffers contained  
577 50 mM Tris-HCl pH 7.4 instead of 50 mM HEPES pH 7.4. Eluates were concentrated to 100  
578 µl and maltose was removed via buffer exchange using 7 MWCO Zeba spin desalting columns.  
579 70 nM heterodimer solutions were each incubated with 1 and 10x molar ratios for 30 min and  
580 bound to amylose resin overnight. Complexes were eluted as described above and complex  
581 formation with trastuzumab and pertuzumab were assessed by Western Blot.

582

583 **DATA AVAILABILITY STATEMENT**

584

585 The data that support the findings of this study are available from the corresponding author  
586 upon request. 3D cryo-EM density maps have been deposited in the Electron Microscopy  
587 Data Bank under the accession number EMD-23916, EMD-23917, and EMD-23918. Atomic  
588 coordinates for the atomic models have been deposited in the Protein Data Bank under the  
589 accession number 7MN5, 7MN6, and 7MN8.

590 **REFERENCES**

591

- 592 1 Sliwkowski, M. X. *et al.* Coexpression of erbB2 and erbB3 proteins reconstitutes a high  
593 affinity receptor for heregulin. *J Biol Chem* **269**, 14661-14665 (1994).
- 594 2 Wallasch, C. *et al.* Heregulin-dependent regulation of HER2/neu oncogenic signaling  
595 by heterodimerization with HER3. *The EMBO Journal* **14**, 4267-4275 (1995).
- 596 3 Moasser, M. M. The oncogene HER2: its signaling and transforming functions and its  
597 role in human cancer pathogenesis. *Oncogene* **26**, 6469-6487,  
598 doi:10.1038/sj.onc.1210477 (2007).
- 599 4 Network, T. C. G. A. Comprehensive Molecular Portraits fo Human Breast Tumors.  
600 *Nature* **490**, 61-70, doi:10.1038/nature11412 (2012).
- 601 5 Lee, J. W. *et al.* Somatic mutations of ERBB2 kinase domain in gastric, colorectal, and  
602 breast carcinomas. *Clin Cancer Res* **12**, 57-61, doi:10.1158/1078-0432.CCR-05-0976  
603 (2006).
- 604 6 Bose, R. *et al.* Activating HER2 mutations in HER2 gene amplification negative breast  
605 cancer. *Cancer Discov* **3**, 224-237, doi:10.1158/2159-8290.CD-12-0349 (2013).
- 606 7 C., L. *et al.* c-erbB-2 Oncoprotein Expression in Primary and Advanced Breast Cancer.  
607 *British Journal of Cancer* **63**, 439-443 (1991).
- 608 8 Slamon, D. J. *et al.* Human breast cancer: correlation of relapse and survival with  
609 amplification of the HER-2/neu oncogene. *Science* **235**, 177-182 (1987).
- 610 9 Peters, S. & Zimmermann, S. Targeted therapy in NSCLC driven by HER2 insertions.  
611 *Transl Lung Cancer Res* **3**, 84-88, doi:10.3978/j.issn.2218-6751.2014.02.06 (2014).
- 612 10 Connell, C. M. & Doherty, G. J. Activating HER2 mutations as emerging targets in  
613 multiple solid cancers. *ESMO Open* **2**, e000279, doi:10.1136/esmoopen-2017-000279  
614 (2017).
- 615 11 Jaiswal, B. S. *et al.* Oncogenic ERBB3 mutations in human cancers. *Cancer Cell* **23**,  
616 603-617, doi:10.1016/j.ccr.2013.04.012 (2013).
- 617 12 Sergina, N. V. *et al.* Escape from HER-family tyrosine kinase inhibitor therapy by the  
618 kinase-inactive HER3. *Nature* **445**, 437-441, doi:10.1038/nature05474 (2007).
- 619 13 Garrett, J. T. *et al.* Transcriptional and posttranslational up-regulation of HER3 (ErbB3)  
620 compensates for inhibition of the HER2 tyrosine kinase. *Proc Natl Acad Sci U S A* **108**,  
621 5021-5026, doi:10.1073/pnas.1016140108 (2011).
- 622 14 Sierke, S. L., Cheng, K., Kim, H. & Koland, J. G. Biochemical characterization of the  
623 protein tyrosine kianse domain of the ErbB3 (HER3) receptor protein. *Biochem J* **322**,  
624 757-763 (1997).

- 625 15 Jura, N., Shan, Y., Cao, X., Shaw, D. E. & Kuriyan, J. Structural analysis of the  
626 catalytically inactive kinase domain of the human EGF receptor 3. *Proc Natl Acad Sci*  
627 *U S A* **106**, 21608-21613, doi:10.1073/pnas.0912101106 (2009).
- 628 16 Zhang, X., Gureasko, J., Shen, K., Cole, P. A. & Kuriyan, J. An allosteric mechanism  
629 for activation of the kinase domain of epidermal growth factor receptor. *Cell* **125**, 1137-  
630 1149, doi:10.1016/j.cell.2006.05.013 (2006).
- 631 17 Littlefield, P. *et al.* Structural analysis of the EGFR/HER3 heterodimer reveals the  
632 molecular basis for activating HER3 mutations. *Science Signaling* **7** (2015).
- 633 18 Ferguson, K. *et al.* EGF Activates Its Receptor by Removing Interactions with  
634 Autoinhibit Ectodomain Dimerization. *Molecular Cell* **11**, 507-517 (2003).
- 635 19 Bouyain, S., Longo, P. A., Li, S., Ferguson, K. M. & Leahy, D. J. The extracellular  
636 region of ErbB4 adopts a tethered conformation in the absence of ligand. *Proc Natl*  
637 *Acad Sci U S A* **102**, 15024-15029, doi:10.1073/pnas.0507591102 (2005).
- 638 20 Cho, H.-S. & Leahy, D. J. Structure of the Extracellular Region of HER3 Reveals an  
639 Interdomain Tether. *Science* **297**, 1330-1333 (2002).
- 640 21 Garrett, J. T. *et al.* Crystal Structure of a Truncated Epidermal Growth Factor Receptor  
641 Extracellular Domain Bound to Transforming Growth Factor alpha. *Cell* **110**, 763-773  
642 (2002).
- 643 22 Ogiso, H. *et al.* Crystal Structure of the Complex of Human Epidermal Growth Factor  
644 and Receptor Extracellular Domains. *Cell* **110**, 775-787 (2002).
- 645 23 Liu, P. *et al.* A single ligand is sufficient to activate EGFR dimers. *Proc Natl Acad Sci*  
646 *U S A* **109**, 10861-10866, doi:10.1073/pnas.1201114109 (2012).
- 647 24 Lu, C. *et al.* Structural evidence for loose linkage between ligand binding and kinase  
648 activation in the epidermal growth factor receptor. *Mol Cell Biol* **30**, 5432-5443,  
649 doi:10.1128/MCB.00742-10 (2010).
- 650 25 Cho, H.-S. *et al.* Structure of the extracellular region of HER2 alone and in complex  
651 with the Herceptin Fab. *Nature* **421**, 756-760, doi:10.1038/nature01423 (2003).
- 652 26 Hao, Y., Yu, X., Bai, Y., McBride, H. J. & Huang, X. Cryo-EM Structure of HER2-  
653 trastuzumab-pertuzumab complex. *PLoS One* **14**, e0216095,  
654 doi:10.1371/journal.pone.0216095 (2019).
- 655 27 Alvarado, D., Klein, D. E. & Lemmon, M. A. ErbB2 resembles an autoinhibited  
656 invertebrate epidermal growth factor receptor. *Nature* **461**, 287-291,  
657 doi:10.1038/nature08297 (2009).
- 658 28 Ferguson, K. M., Darling, P. J., Mohan, M. J., Macatee, T. L. & Lemmon, M. A.  
659 Extracellular domains drive homo- but not hetero- dimerization of erbB receptors. *The*  
660 *EMBO Journal* **19**, 4632-4643 (2000).
- 661 29 Fry, D. *et al.* Specific, irreversible inactivation of the epidermal growth factor receptor  
662 and erbB2, by a new class of tyrosine kinase inhibitor. *Proc Natl Acad Sci U S A* **95**,  
663 12022-12027 (1998).
- 664 30 Palovcak, E. *et al.* A simple and robust procedure for preparing graphene-oxide cryo-  
665 EM grids. *J Struct Biol* **204**, 80-84, doi:10.1016/j.jsb.2018.07.007 (2018).
- 666 31 Wang, F. *et al.* General and robust covalently linked graphene oxide affinity grids for  
667 high-resolution cryo-EM. *Proc Natl Acad Sci U S A* **117**, 24269-24273,  
668 doi:10.1073/pnas.2009707117 (2020).
- 669 32 Freed, D. M. *et al.* EGFR Ligands Differentially Stabilize Receptor Dimers to Specify  
670 Signaling Kinetics. *Cell* **171**, 683-695 e618, doi:10.1016/j.cell.2017.09.017 (2017).
- 671 33 Huang, Y. *et al.* A structural mechanism for the generation of biased agonism in the  
672 epidermal growth factor receptor. *bioRxiv*, doi:10.1101/2020.12.08.417006 (2020).

- 673 34 Garrett, J. T. *et al.* The Crystal Structure of a Truncated ErbB2 Ectodomain Reveals an  
674 Active Conformation, Poised to Interact with Other ErbB Receptors. *Molecular Cell*  
675 **11**, 495-505 (2003).
- 676 35 Greulich, H. *et al.* Functional analysis of receptor tyrosine kinase mutations in lung  
677 cancer identifies oncogenic extracellular domain mutations of ERBB2. *Proc Natl Acad*  
678 *Sci U S A* **109**, 14476-14481, doi:10.1073/pnas.1203201109 (2012).
- 679 36 Wang, T. *et al.* HER2 somatic mutations are associated with poor survival in HER2-  
680 negative breast cancers. *Cancer Sci* **108**, 671-677, doi:10.1111/cas.13182 (2017).
- 681 37 Franklin, M. C. *et al.* Insights into ErbB signaling from the structure of the ErbB2-  
682 pertuzumab complex. *Cancer Cell* **5**, 317-328 (2004).
- 683 38 Alvarado, D., Klein, D. E. & Lemmon, M. A. Structural basis for negative cooperativity  
684 in growth factor binding to an EGF receptor. *Cell* **142**, 568-579,  
685 doi:10.1016/j.cell.2010.07.015 (2010).
- 686 39 Arkhipov, A., Shan, Y., Kim, E. T., Dror, R. O. & Shaw, D. E. Her2 activation  
687 mechanism reflects evolutionary preservation of asymmetric ectodomain dimers in the  
688 human EGFR family. *Elife* **2**, e00708, doi:10.7554/eLife.00708 (2013).
- 689 40 Xu, W. *et al.* Surface charge and hydrophobicity determine ErbB2 binding to the Hsp90  
690 chaperone complex. *Nat Struct Mol Biol* **12**, 120-126, doi:10.1038/nsmb885 (2005).
- 691 41 Zheng, S. Q. *et al.* MotionCor2: anisotropic correction of beam-induced motion for  
692 improved cryo-electron microscopy. *Nat Methods* **14**, 331-332,  
693 doi:10.1038/nmeth.4193 (2017).
- 694 42 Punjani, A., Rubinstein, J. L., Fleet, D. J. & Brubaker, M. A. cryoSPARC: algorithms  
695 for rapid unsupervised cryo-EM structure determination. *Nat Methods* **14**, 290-296,  
696 doi:10.1038/nmeth.4169 (2017).
- 697 43 Scheres, S. H. RELION: implementation of a Bayesian approach to cryo-EM structure  
698 determination. *J Struct Biol* **180**, 519-530, doi:10.1016/j.jsb.2012.09.006 (2012).
- 699 44 Kucukelbir, A., Sigworth, F. & Tagare, H. Quantifying the local resolution of cryo-EM  
700 density maps. *Nature Methods* **11** (2014).
- 701 45 Tan, Y. Z. *et al.* Addressing preferred specimen orientation in single-particle cryo-EM  
702 through tilting. *Nat Methods* **14**, 793-796, doi:10.1038/nmeth.4347 (2017).
- 703 46 Asarnow, D., Palovcak, E. & Cheng, Y. UCSF pyem v0.5. . *Zenodo* (2019).
- 704 47 DiMaio, F. *et al.* Atomic-accuracy models from 4.5-Å cryo-electron microscopy data  
705 with density-guided iterative local refinement. *Nat Methods* **12**, 361-365,  
706 doi:10.1038/nmeth.3286 (2015).
- 707 48 Emsley, P., Lohkamp, B., Scott, W. G. & Cowtan, K. Features and development of  
708 Coot. *Acta Crystallogr D Biol Crystallogr* **66**, 486-501,  
709 doi:10.1107/S0907444910007493 (2010).
- 710 49 Croll, T. I. ISOLDE: a physically realistic environment for model building into low-  
711 resolution electron-density maps. *Acta Crystallogr D Struct Biol* **74**, 519-530,  
712 doi:10.1107/S2059798318002425 (2018).
- 713 50 Pettersen, E. F. *et al.* UCSF Chimera--a visualization system for exploratory research  
714 and analysis. *J Comput Chem* **25**, 1605-1612, doi:10.1002/jcc.20084 (2004).
- 715 51 Frenz, B. *et al.* Automatically Fixing Errors in Glycoprotein Structures with Rosetta.  
716 *Structure* **27**, 134-139 e133, doi:10.1016/j.str.2018.09.006 (2019).
- 717 52 Adams, P. D. *et al.* PHENIX: a comprehensive Python-based system for  
718 macromolecular structure solution. *Acta Crystallogr D Biol Crystallogr* **66**, 213-221,  
719 doi:10.1107/S0907444909052925 (2010).
- 720 53 Agirre, J. *et al.* Privateer: software for the conformational validation of carbohydrate  
721 structures. *Nat Struct Mol Biol* **22**, 833-834, doi:10.1038/nsmb.3115 (2015).
- 722
